# Supplementary material
Source: PubMed Central journal article supplement (PMC3993434)

**Supplementary figure.** 2D-electrophoresis analyses of healthy human PBMCs co-cultured with *O. viverrini* for 6h, 12h, or 24h. PBMC proteins (150  $\mu$ g) were separated on 7 cm, pH 3-10 non-linear IPG strips, followed by electrophoresis in 12% polyacrylamide gels and stained with Coomassie Brilliant Blue R-250. One representative gel from each time point was labeled with spots numbers (corresponding to those in Table 1) showing significantly altered expression compared to untreated control.

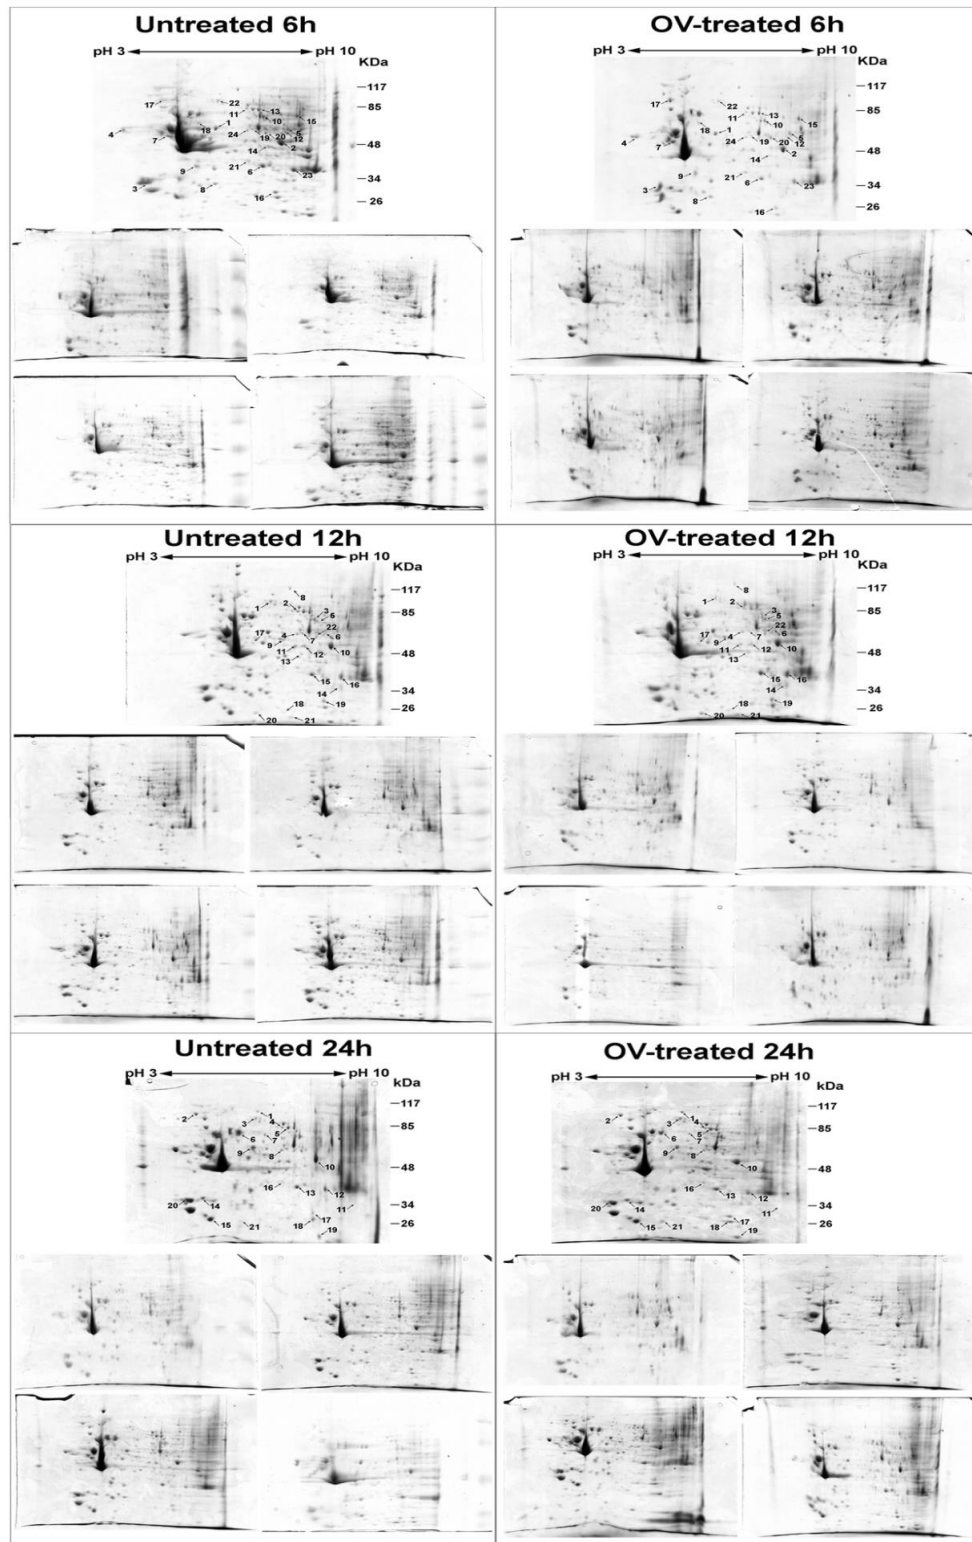

Supplement: IAI.00901-13_zii999090658so1.pdf [file IAI.00901-13_zii999090658so1.pdf]
